# Supplementary material
Source: publisher figshare collection journal article supplement (https://frontiersin.figshare.com/ndownloader/files/32420117)
Supplement: Supplementary file 1 [file 32420117]

Annex 1

Unified interview questions for stakeholders.

1. How did the COVID-19 pandemic influence the provision of school meal in practice? (please describe any modifications you had to introduce, e.g. different dining times, advance announcements of attending the school presence, take-out model)
2. Have you provided/prepared school meals for pupils during the period from March 2020 - March 2021? (Please describe the times you were obliged to provide meals, when they were provided as an option, or when the meal provision was suspended. If possible, give the time periods and specify the month, e.g. from April-June 2020. Were all the pupils given the meals or only selected groups?).
3. In cases of school lockdowns - has the provision of school meals continued? If yes - how? Were there any substitutes? (e.g. a shopping bag of products, vouchers).
4. What were the biggest challenges you faced in relation to the COVID-19 pandemic while providing school meals?
5. Have you faced staff-related issues? E.g. lay-offs, lowered occupational well-being of staff, unwillingness to work because of a risk of contamination/infection?.
6. (if applicable) As a professional, have you been worried how the change in the provision of school meals will influence pupils’ health/nutrition?
7. Have you faced changes in food-waste generation during the COVID-19 pandemic?
8. Have you had additional costs?
9. Have you faced technical/operational issues? (e.g. problems with packaging, a need for changes to recipes, unsuitable technology?
